# Supplementary material for: Single-dose BNT162b2 vaccine protects against asymptomatic SARS-CoV-2 infection
Source: eLife. 2021 Apr 8;10:e68808. doi: 10.7554/eLife.68808 (PMC8064747; doi:10.7554/eLife.68808)
Supplement: Figure 1—source data 1. [file elife-68808-fig1-data1.xlsx]

## Sheet: Figure 1
Main graph					CT value plot					Unvaccinated			Vaccinated <12/7			Vaccinated >=12/7
	Unvaccinated	<12 days	>=12 days			Unvaccinated	Vaccinated <12/7	Vaccinated >=12/7		Random number for x-axis	CT value		Random number for x-axis	CT value		Random number for x-axis	CT value
Week 1	0.00778745	0.004662	0.00207039		MEDIAN CT	23.25	23.6	30.3		0.834537	15		0.455165	15		0.763074	21.2
Week 2	0.00841908	0.00274876	0.00199203		IQR	9.75	8.1	4.8		0.96843	16.8		0.955346	18.9		0.426898	29.5
										0.0737498	18.9		0.484443	19.3		0.92081	31.1
										0.714215	19		0.755402	20.5		0.73949	35.6
										0.250776	19.5		0.863334	21.4
										0.484637	20.4		0.863305	23.5
										0.121785	20.8		0.486796	23.6
										0.823674	20.9		0.879663	25.2
										0.799218	20.9		0.483922	26.7
										0.359029	21.3		0.509228	28.6
										0.416813	21.8		0.408788	30.6
										0.574606	22.1		0.854777	34.8
										0.510356	22.7		0.697359	35.9
										0.38036	23.8
										0.471773	24.3
										0.125592	25.6
										0.338169	27.7
										0.628375	28.7
										0.379921	30.5
										0.782038	30.6
										0.695968	31.6
										0.148364	32.5
										0.418537	32.9
										0.426584	34.3
										0.966493	34.9
										0.843391	35
